# Supplementary material
Source: Springer Nature journal article supplement (https://www.springermedizin.de/resource/supplementary/12943_2013_1521_MOESM7_ESM.pdf/9552440)

# PDPN/GAPDH

**A**
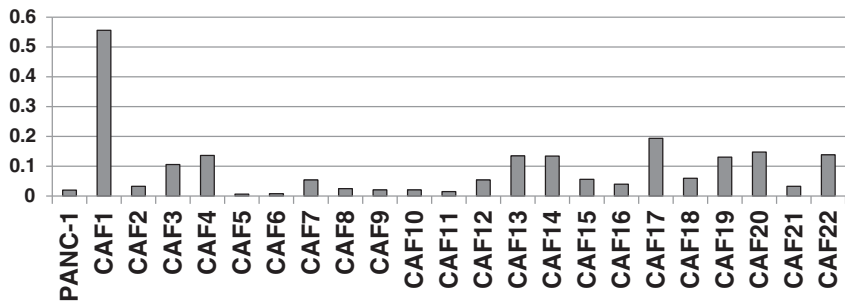
**B**
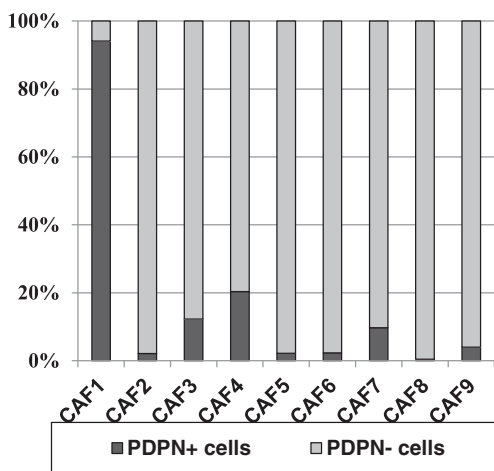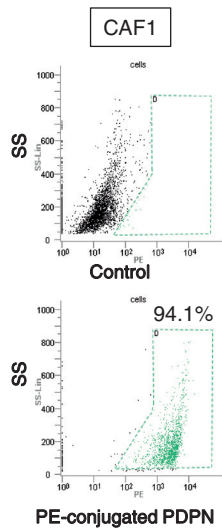
**C**
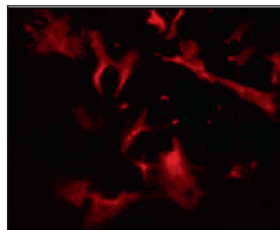

$\alpha$ -SMA

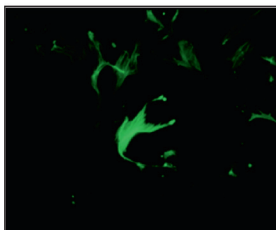

PDPN

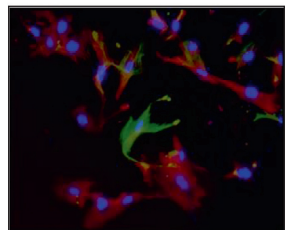

DAPI Merge

Supplement: MOESM7 [file 9552440]
